# Supplementary figures and images for: Factors Affecting Mental Health Professionals’ Sharing of Their Lived Experience in the Workplace: A Scoping Review
Source: Atypon-hosted journal article supplement (doi:10.1176/appi.ps.201900606), 2020-09-03

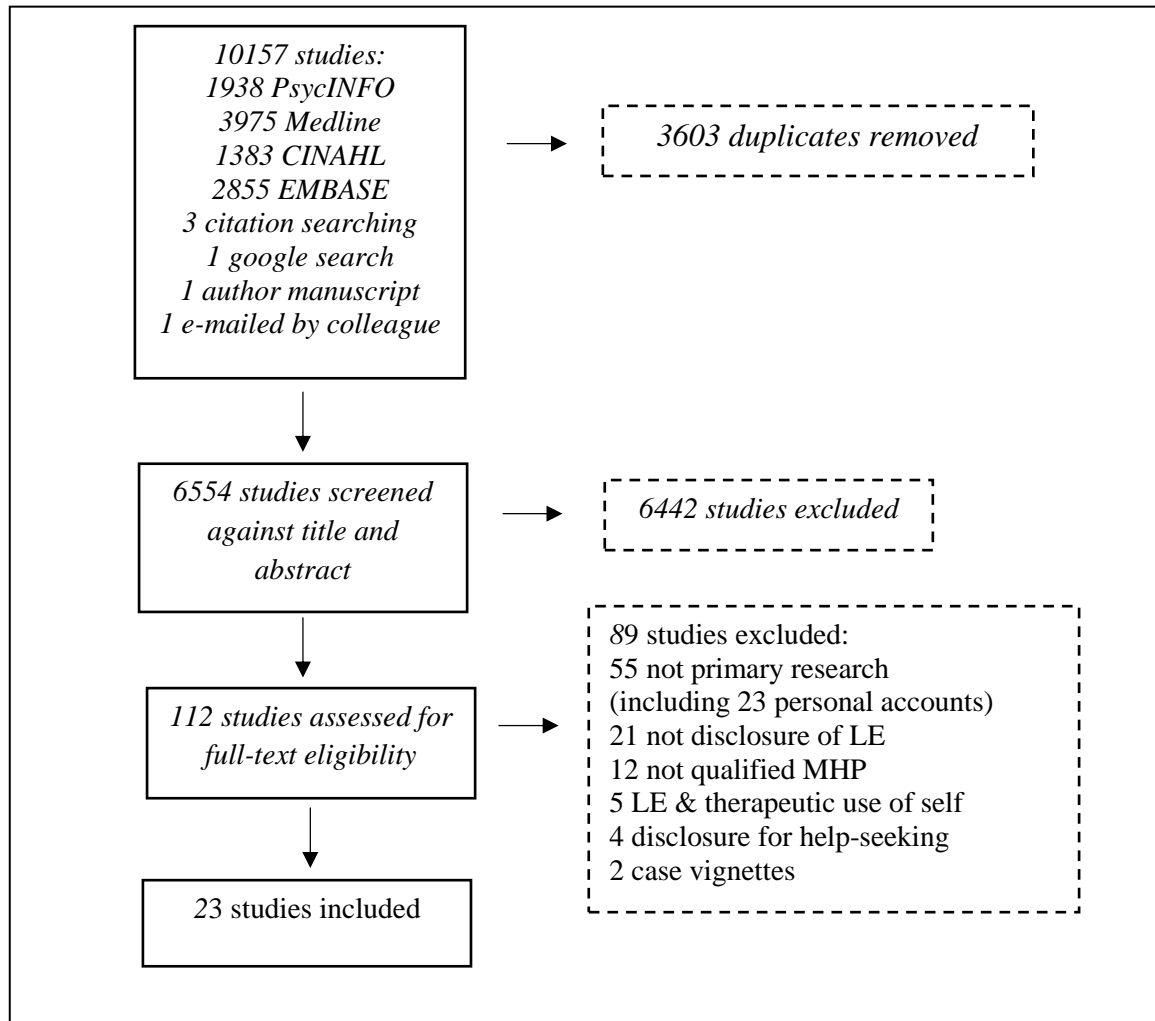

PRISMA diagram of study screening

Supplement: appi.ps.201900606.ds001.pdf [file appi.ps.201900606.ds001.pdf]
